# Supplementary material for: IZUMO1 Receptor Localization during Hyaluronic Acid Selection in Human Spermatozoa
Source: MDPI journal article supplement (doi:10.3390/biomedicines11112872), 2023-10-24
Supplement: s1 [file s1]

**Table S1.** Statistical data of IZUMO1 distribution in NCS, CS1, MS1 and IS1. Data are expressed as mean  $\pm$  SD (standard deviation).

| Pattern | NCS              | CS1              | MS1              | IS1               |
|---------|------------------|------------------|------------------|-------------------|
| P1      | 69.51 $\pm$ 9.12 | 66.96 $\pm$ 7.19 | 73.47 $\pm$ 8.74 | 24.99 $\pm$ 21.98 |
| P2      | 1.79 $\pm$ 1.28  | 1.81 $\pm$ 2.58  | 14.65 $\pm$ 5.79 | 0.55 $\pm$ 1.23   |
| P3      | 2.90 $\pm$ 2.64  | 2.64 $\pm$ 2.08  | 8.87 $\pm$ 6.40  | 16.91 $\pm$ 5.57  |
| P4      | 25.79 $\pm$ 7.82 | 28.59 $\pm$ 5.60 | 3.02 $\pm$ 5.22  | 57.55 $\pm$ 17.18 |

P1, showed dotted fluorescence in the acrosomal region; P2, displayed dotted fluorescence in the acrosomal region with a labelled equatorial region; P3, equatorial region labelled; P4, not labelled; NCS, noncapacitated sperm; CS1, one-hour capacitated sperm, MS1 and IS1, mature and immature sperm selected by hyaluronic acid after one-hour capacitation.

**Table S2.** Statistical differences of IZUMO1 staining patterns between different sperm physiological conditions (NCS, CS1, MS1 and IS1).

| Significance between Physiological Conditions |      |      |      | Patterns | Physiological Condition |
|-----------------------------------------------|------|------|------|----------|-------------------------|
| NCS                                           | CS1  | MS1  | IS1  |          |                         |
| -                                             | n.s. | n.s. | ***  | P1       | NCS                     |
| -                                             | n.s. | ***  | n.s. | P2       |                         |
| -                                             | n.s. | n.s. | ***  | P3       |                         |
| -                                             | n.s. | *    | ***  | P4       |                         |
|                                               | -    | n.s. | ***  | P1       | CS1                     |
|                                               | -    | ***  | n.s. | P2       |                         |
|                                               | -    | n.s. | ***  | P3       |                         |
|                                               | -    | **   | **   | P4       |                         |
|                                               |      | -    | ***  | P1       | MS1                     |
|                                               |      | -    | ***  | P2       |                         |
|                                               |      | -    | n.s. | P3       |                         |
|                                               |      | -    | ***  | P4       |                         |
|                                               |      |      | -    | P1       | IS1                     |
|                                               |      |      | -    | P2       |                         |
|                                               |      |      | -    | P3       |                         |
|                                               |      |      | -    | P4       |                         |

P1, showed dotted fluorescence in the acrosomal region; P2, displayed dotted fluorescence in the acrosomal region with a labelled equatorial region; P3, equatorial region labelled; P4, not labelled; NCS, noncapacitated sperm; CS1, one-hour capacitated sperm, MS1 and IS1, mature and immature sperm selected by hyaluronic acid after one-hour capacitation.

\*\*\* Bonferroni post hoc test  $p$ -value  $\leq 0.001$ ; \*\* Bonferroni post hoc test  $p$ -value  $\leq 0.01$ ; \* Bonferroni post hoc test  $p$ -value  $\leq 0.05$ ; n.s. not significant.
